# Supplementary material for: Deciphering the Drivers of Net Primary Productivity of Vegetation in Mining Areas
Source: MDPI journal article supplement (doi:10.3390/rs14174177), 2022-08-25
Supplement: s1 [file s1]

# Supplementary Materials

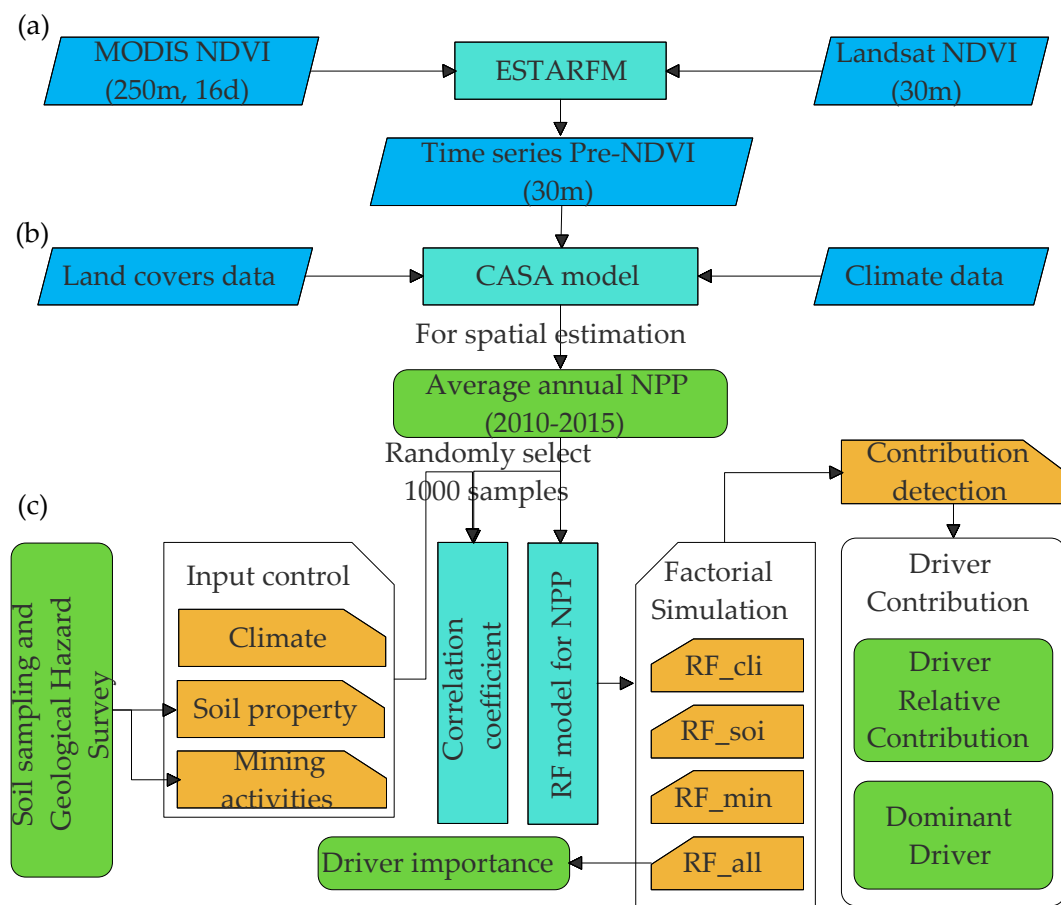

**Figure S1.** Flowcharts for the simulation of NPP in mining areas (a, b) and experimental design for driving factors analysis (c).

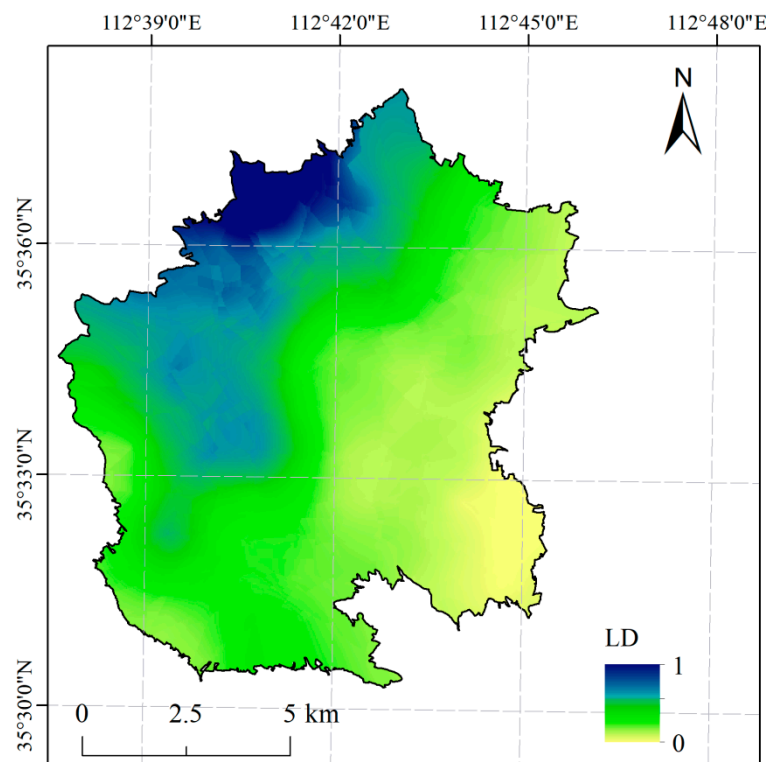

**Figure S2.** Spatial distribution of land degradation in Changhe Basin.

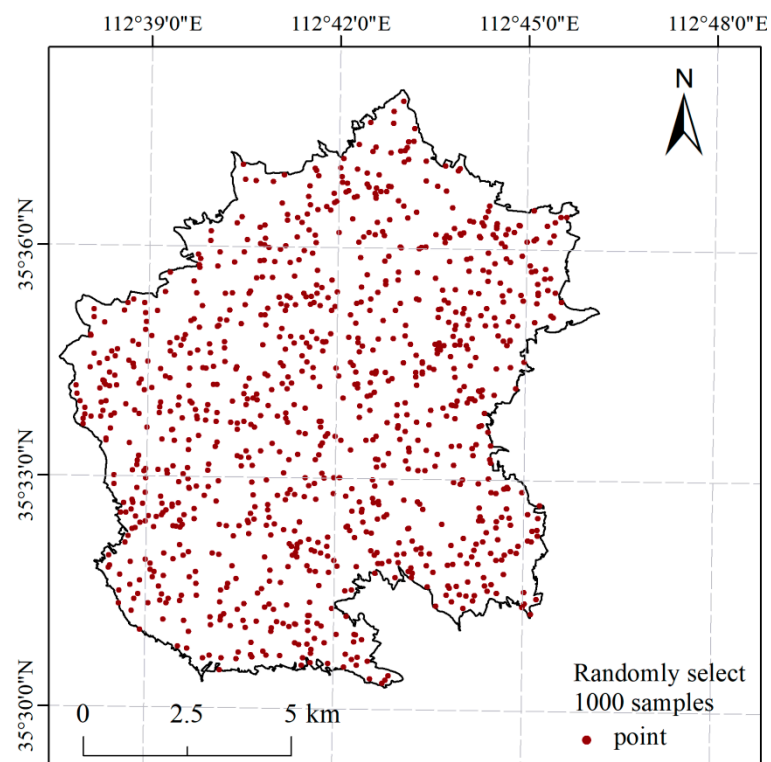

**Figure S3.** Spatial distribution of 1000 randomly sampled points.

**Table S1.** Quantitative indicator system of land degradation.

| Indicators       | Weight | Quantitative method                                                          | Remarks                                                                                                                                                                                                                                                                                                                                                                                                                                                  |
|------------------|--------|------------------------------------------------------------------------------|----------------------------------------------------------------------------------------------------------------------------------------------------------------------------------------------------------------------------------------------------------------------------------------------------------------------------------------------------------------------------------------------------------------------------------------------------------|
| Subsidence depth | +0.233 | $H = mqw \cos \alpha$                                                        | Combined with the coal seam excavation engineering plans, the uphole and downhole comparison map, the coal mining disturbance map and the mine-field development map, $H$ is the depth of subsidence; $m$ is the thickness of the coal seam; $q$ is the coefficient of surface subsidence; $w$ is the coefficient of full mining; $H_0$ is the average mining depth; $\alpha$ is the inclination angle of the coal seam; $r$ is the radius of influence. |
| Stability        | -0.125 | $T = 2.5H_0$                                                                 |                                                                                                                                                                                                                                                                                                                                                                                                                                                          |
| Additional slope | +0.131 | $C = \frac{H}{18r} e^{-\pi \frac{x^2}{r^2}}$                                 |                                                                                                                                                                                                                                                                                                                                                                                                                                                          |
| Destroyed land   | +0.212 | Land collapse, subsidence, goaf, etc.                                        | Field survey                                                                                                                                                                                                                                                                                                                                                                                                                                             |
| Crack density    | +0.137 | Number of cracks / area                                                      | Field survey                                                                                                                                                                                                                                                                                                                                                                                                                                             |
| Seeper           | +0.162 | Subsidence not water area=0、 seasonal water area=0.5、 perennial water area=1 | Field survey                                                                                                                                                                                                                                                                                                                                                                                                                                             |

Note: “-” and “+” respectively represent the action trend of each indicator factor.
